# Supplementary material for: Aluminium chloride promotes tumorigenesis and metastasis in normal murine mammary gland epithelial cells
Source: PubMed Central journal article supplement — Int J Cancer. 2016 Sep 7;139(12):2781–90. doi: 10.1002/ijc.30393 (PMC5095782; doi:10.1002/ijc.30393), 2016-09-07

**Fig. S1.** HE stained section of the liver of a NSG female mouse injected with NMuMG cells cultured in the presence of  $\text{AlCl}_3$  100 $\mu\text{M}$  for 6 months. The mouse was from the same experiment described in Fig. 3. **B)** Cytokeratin 7 or **C)** Cytokeratin 19 immunohistochemistry on adjacent sections. Bar in A-C= 50 $\mu\text{m}$ .

**Fig. S2.** NMuMG cells were seeded in 6 well plates at the density of 5'000 cells/well in triplicate, and cultured in the presence of the indicated concentrations of  $\text{AlCl}_3$ , or of the same dilution of solvent ( $\text{H}_2\text{O}$ ) alone for 7 days. The graph shows the number of cells  $\pm$  SEM for each experimental condition at the end of the assay.

Fig. S1

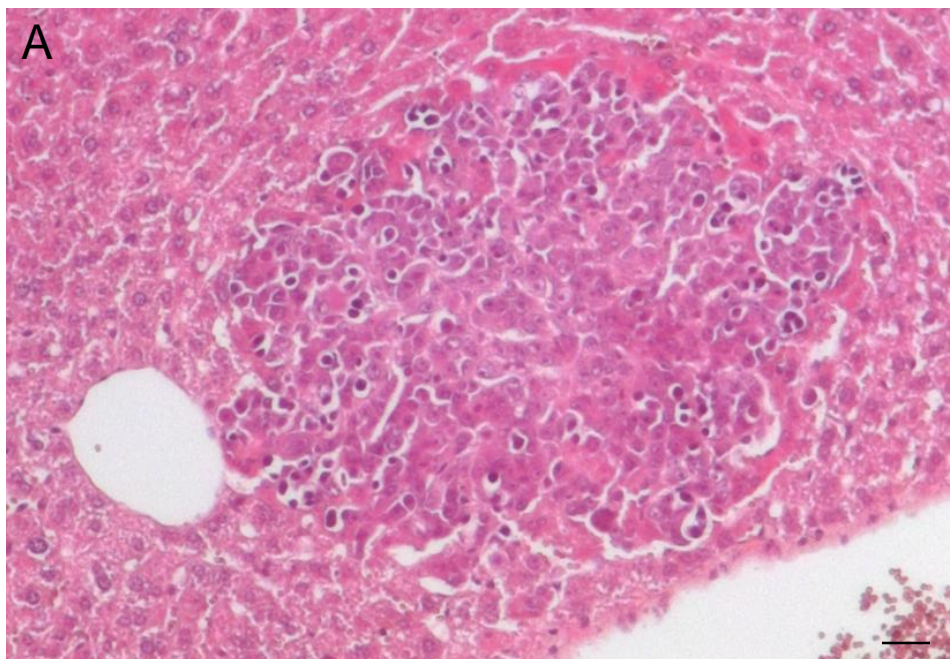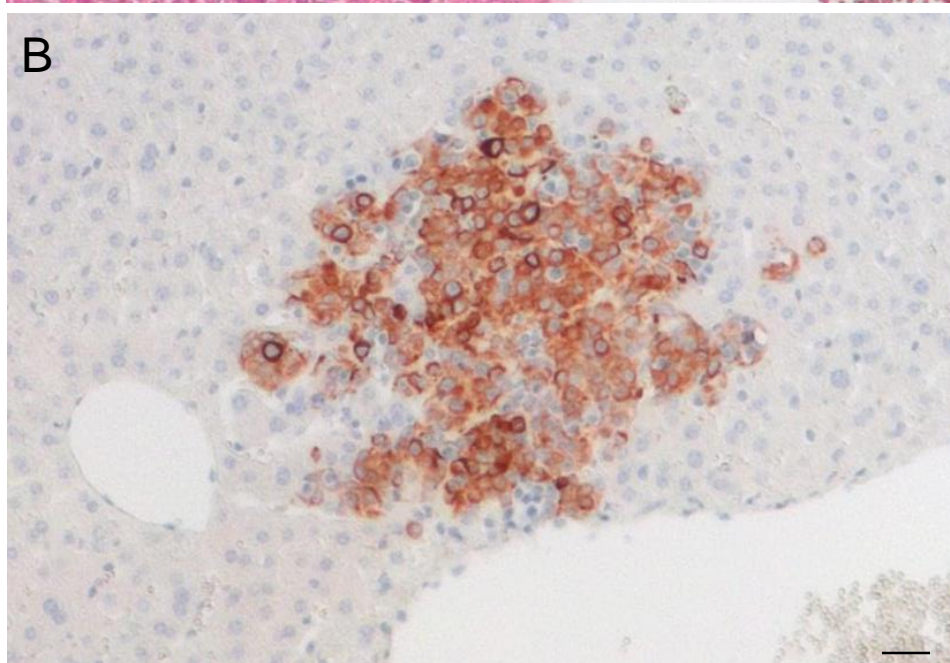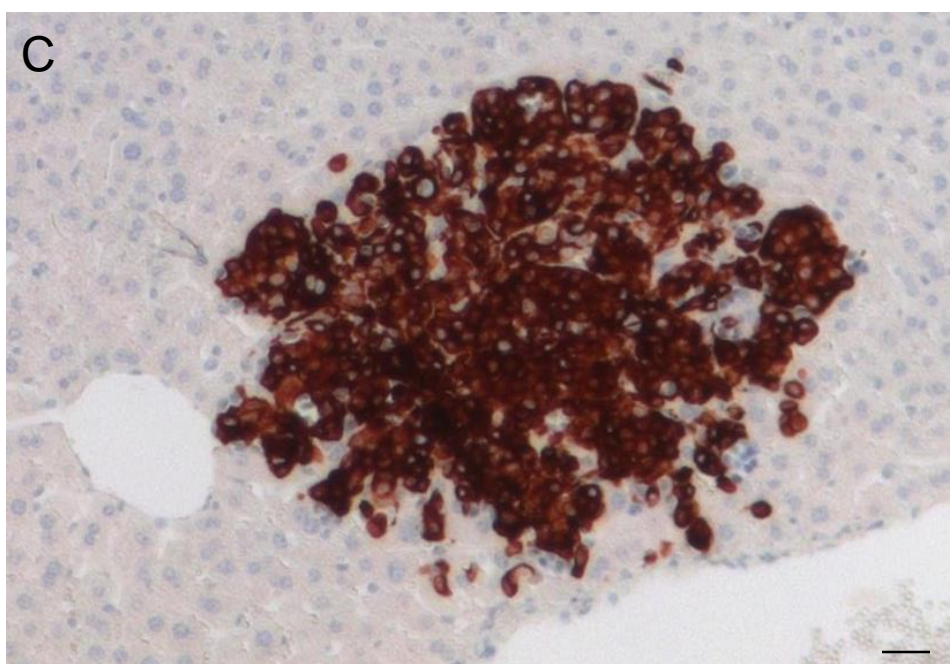

Fig. S2

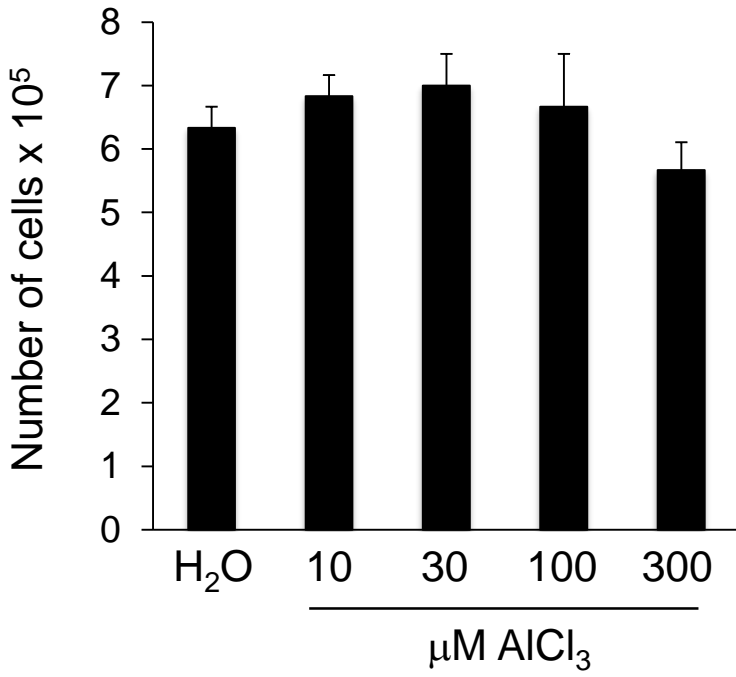

Supplement: IJC-139-2781-s001.pdf [file IJC-139-2781-s001.pdf]
